# Supplementary material for: Prevalence of the SigB-Deficient Phenotype among Clinical Staphylococcus aureus Isolates Linked to Bovine Mastitis
Source: MDPI journal article supplement (doi:10.3390/antibiotics12040699), 2023-04-03
Supplement: s1 [file s1]

Figure S1, Determination of carotenoid pigmentation

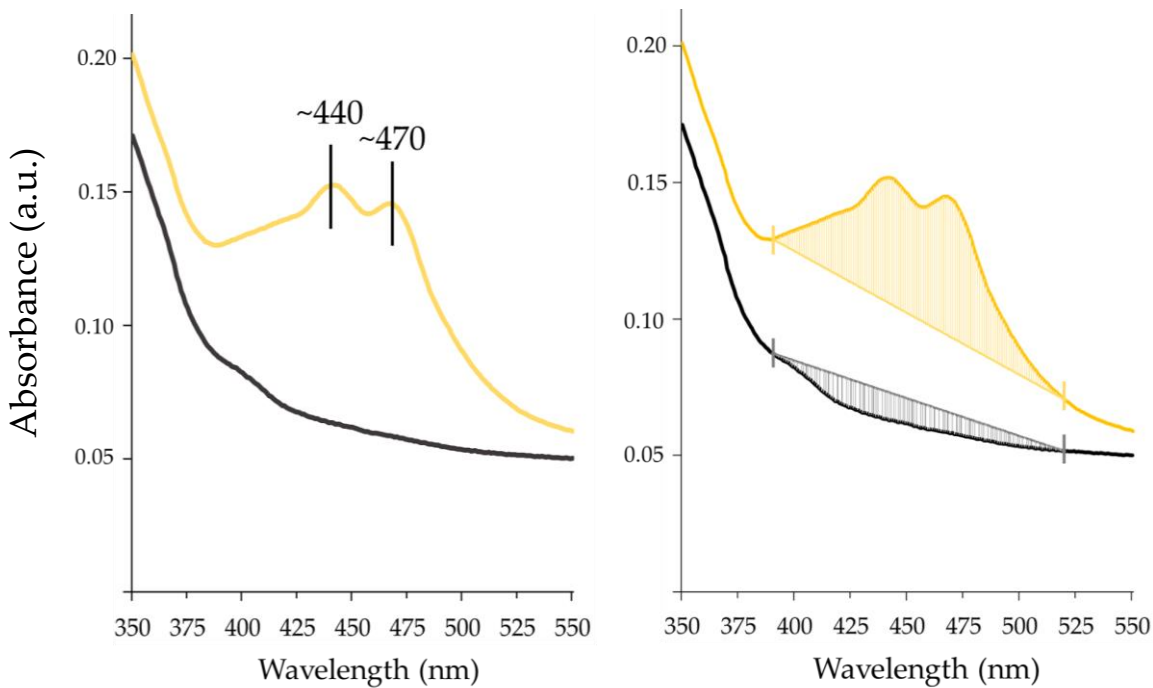

Average spectra and AUC of SigB-functional (SH1000, 6850, and IN) and SigB-deficient (SH1000 $\Delta$ sigB, 8325-4, 6850 $\Delta$ sigB and HA) reference strains. Spectral profile and characteristic peak maxima at ~ 440 nm and ~ 470 nm of *S. aureus* carotenoid pigmentation; Area under the curve (AUC) for each spectrum with baseline adjusted as a straight line through the OD values at 390 and 520 nm. AUC of SigB-functional strains (yellow hatched) and AUC of SigB-deficient strains (black hatched). a.u., arbitrary units.

|                                                                    |                                                                                    |                                                                                     | Reference strains                                                                   | SigB-activity       | AUC <sub>390-520</sub> | AUC <sub>390-520</sub> |         |
|--------------------------------------------------------------------|------------------------------------------------------------------------------------|-------------------------------------------------------------------------------------|-------------------------------------------------------------------------------------|---------------------|------------------------|------------------------|---------|
| SigB-functional                                                    |  |  |  | SH1000              | +                      | 3.8827                 |         |
|                                                                    |                                                                                    |                                                                                     |                                                                                     | SH1000Δ <i>sigB</i> | -                      |                        | -0.7956 |
|                                                                    |                                                                                    |                                                                                     |                                                                                     | 8325-4              | -                      |                        | -0.6586 |
| SigB-deficient                                                     |  |  |  | 6850                | +                      | 2.5503                 |         |
|                                                                    |                                                                                    |                                                                                     |                                                                                     | 6850Δ <i>sigB</i>   | -                      |                        | -0.8975 |
| SigB-functional                                                    |  |  |  | IN                  | +                      | 2.7089                 |         |
|                                                                    |                                                                                    |                                                                                     |                                                                                     | HA                  | -                      |                        | -1.1001 |
| <hr/>                                                              |                                                                                    |                                                                                     |                                                                                     |                     |                        |                        |         |
| average AUC <sub>390-520</sub> of SigB-deficient reference strains |                                                                                    |                                                                                     |                                                                                     |                     |                        |                        | -0.8630 |
| SD (AUC <sub>390-520</sub> ) of SigB-deficient reference strains   |                                                                                    |                                                                                     |                                                                                     |                     |                        |                        | 0.2194  |

Bacterial pigmentation (centrifuged pellet) and measured AUC<sub>390-520</sub> values of extracted pigments of SigB-functional and -deficient reference strains.

Figure S2, *Asp23*-mRNA expression of mastitis isolates

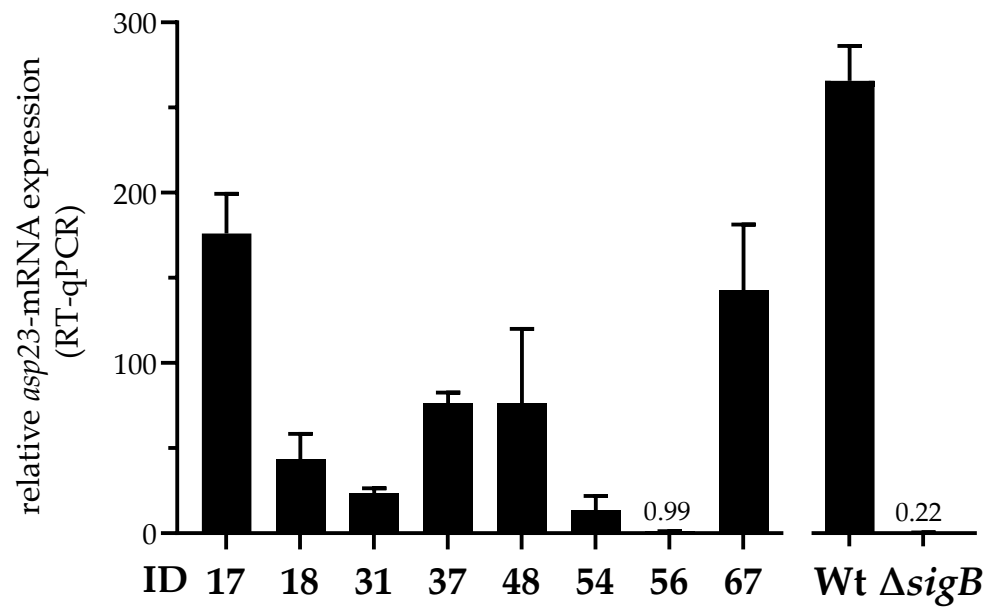

*Asp23*-mRNA expression (RT-qPCR) of mastitis isolates exhibiting the SigB-deficient phenotype. SH1000 (WT) and the isogenic  $\Delta sigB$  mutant were included as assay control and reference.

Table S1, Oligonucleotides used for genetic manipulation in this study

| Name                 | 5'-3' sequence                                 | Restriction site | Ref.       |
|----------------------|------------------------------------------------|------------------|------------|
| <i>rsbU</i> :G368A_F | TATAGTCGACTTTAAGCGCTGTATCCACCA                 | Sall             | this study |
| <i>rsbU</i> :G368A_R | TATAGAGCTCACGCCTAATTTTCTGGTGAGC                | SacI             |            |
| <i>rsbU</i> :T431G_A | AGGGAACAAAAGCTGGGTACCAGGGTTTAATTGATGAAAGTTTAAC | KpnI             |            |
| <i>rsbU</i> :T431G_B | GCAAAGCTCATTGTGcCATCGTTATGG *                  |                  |            |
| <i>rsbU</i> :T431G_C | CCATAACGATGgCACAATGAGCTTTGC *                  |                  |            |
| <i>rsbU</i> :T431G_D | AACATAAACATATGCACCCACAAGGAGCTCCAATTCGCCCTAT    | SacI             |            |

\* Targeted point mutations to introduce the T431G exchange are indicated by lower case letters
